# Supplementary material
Source: HighWire-hosted journal article supplement (https://genome.cshlp.org/content/suppl/2009/05/01/19.5.934)
Supplement: Supp_Material.pdf [file Supp_Material.pdf]

## Supplementary Material

### RECOVERING GENOME REARRANGEMENTS IN THE MAMMALIAN PHYLOGENY

Hao Zhao and Guillaume Bourque<sup>†</sup>

<sup>†</sup> [bourque@gis.a-star.edu.sg](mailto:bourque@gis.a-star.edu.sg)

#### Supplementary Text

##### *EMRAE Pseudo-code*

##### **Algorithm EMRAE ( $G_1, G_2, \dots, G_m, T$ )**

**Input:** Genomes  $G_1, G_2, \dots, G_m$ , and their phylogenetic tree  $T$

**Output:** Inferred events on every edge  $e$  in  $T$

1. **for** each edge  $e = (A, B)$  in  $T$  **do**
2.     Compute conserved adjacencies  $CA(e, A)$  and  $CA(e, B)$
3. **for** each edge  $e = (A, B)$  in  $T$  **do**
4.     Refine  $CA(e, A)$  and  $CA(e, B)$
6. **for** each edge  $e = (A, B)$  in  $T$  **do**
7.     Infer every possible reversal  $r$  and translocation  $tloc$  and remove the 4 related adjacencies from  $CA(e, A)$  and  $CA(e, B)$
8. **for** each edge  $e = (A, B)$  in  $T$  **do**
9.     Infer every possible transposition  $t$  and remove the 6 related adjacencies from  $CA(e, A)$  and  $CA(e, B)$
10.    Infer every possible fusion and fission

##### *Localization of predicted rearrangement events*

The events predicted by EMRAE are partial in the sense that a predicted event is only represented by the adjacencies associated with it and these adjacencies do not have an orientation. We will now show how to define and check if a predicted event can be localized on a particular genome, we such call such events *actual*. Assume a predicted

reversal from the ancestor A to B on an edge  $e = (A, B)$  affects four blocks 1, 2, 3 and 4 and is represented by  $a(1, -3)$ ,  $a(-2, 4)$  at the side A and their counterparts  $a(1, 2)$ ,  $a(3, 4)$  at the leaf B. Note that though conserved adjacencies have no orientations, if B is a leaf genome, then the orders and orientations of the four blocks 1, 2, 3, and 4 on B are unambiguous. We perform the reversal  $r$  on  $a(1, 2)$  and  $a(3, 4)$  from B back to its ancestor A. If the resulted genome includes their counterparts  $a(1, -3)$  and  $a(-2, 4)$ , then we call the reversal  $r$  is an *actual reversal* from the ancestor A to its leave B on the edge  $e = (A, B)$ . Although it is natural that a predicted reversal can be an actual one, this does not always happen. In the example above, again we assume the reversal  $r$  is associated with the same four adjacencies. Further we assume that the chromosome affected by  $r$  of genome B is  $\dots 1\ 2\ \dots\ -4\ -3\ \dots$ . Then genome B contains the two adjacencies  $a(1, 2)$  and  $a(3, 4)$ . Since adjacencies have no orientations,  $a(-4, -3)$  is equal to  $a(3, 4)$ . But this time when we perform the reversal from B to A, then the two adjacencies  $a(1, 2)$  and  $a(3, 4)$  are transformed into  $a(1, 4)$  and  $a(-2, -3)$  at A, different from the expected counterparts  $a(1, -3)$  and  $a(-2, 4)$ . We call such a reversal  $r$  as an ambiguous prediction. We can check predicted transpositions similarly. Translocations can be always directly performed since it can exchange genomic content in two ways (see the definition of translocations). The simpler fusion/fission is only associated with one conserved adjacency and can always be actual ones (see our Inference Rules). In our analysis of the predictions, we remove ambiguous predictions and only focus on actual events. For predictions on internal edges, our definitions are similar but a little more stringent. In the above example, if A is the ancestor of B, and B is the common ancestor of human, chimp, then we call a reversal

r on  $e = (A, B)$  only if it can be performed directly from both human and chimp to B. See Sup. Table 4.

#### *Evaluation of MGR's ability to predict transpositions*

MGR does not model transpositions. As mentioned in the main text, to evaluate MGR's prediction of transpositions, we used three MGR's consecutive reversals to mimic an intra-chromosomal transposition (Zhao and Bourque 2007). Based on a similar idea, we used two translocations to mimic an inter-chromosomal transposition, with which a consecutive segment of blocks are moved to a different chromosome. For example, assume an inter-transposition  $t$  acting on two chromosomes  $\text{chr1} = 1\ 2\ 3\ 4\ 5\ 6$  and  $\text{chr2} = 7\ 8\ 9\ 10$  picks up the segment 3 4 from chr1 and places it after the block 8 in chr2. Then  $t$  leads to two new chromosomes  $\text{chr1}' = 1\ 2\ 5\ 6$  and  $\text{chr2}' = 7\ 8\ 3\ 4\ 9\ 10$ . The following is a possible way to mimic  $t$  with two translocations. In the first step, a translocation  $tloc_1$  is performed to exchange the segment 3 4 5 6 of chr1 with 9 10 of chr2 and it leads to two intermediate chromosomes  $\text{chr1}'' = 1\ 2\ 9\ 10$  and  $\text{chr2}'' = 7\ 8\ 3\ 4\ 5\ 6$ . In the second step another translocation  $tloc_2$  exchanges 9 10 of  $\text{chr1}''$  with 5 6 of  $\text{chr2}''$ . Thus the two consecutive translocations  $tloc_1$  and  $tloc_2$  work equivalently as the transposition  $t$  and get the target chromosomes  $\text{chr1}' = 1\ 2\ 5\ 6$  and  $\text{chr2}' = 7\ 8\ 3\ 4\ 9\ 10$ .

## Supplementary Figures

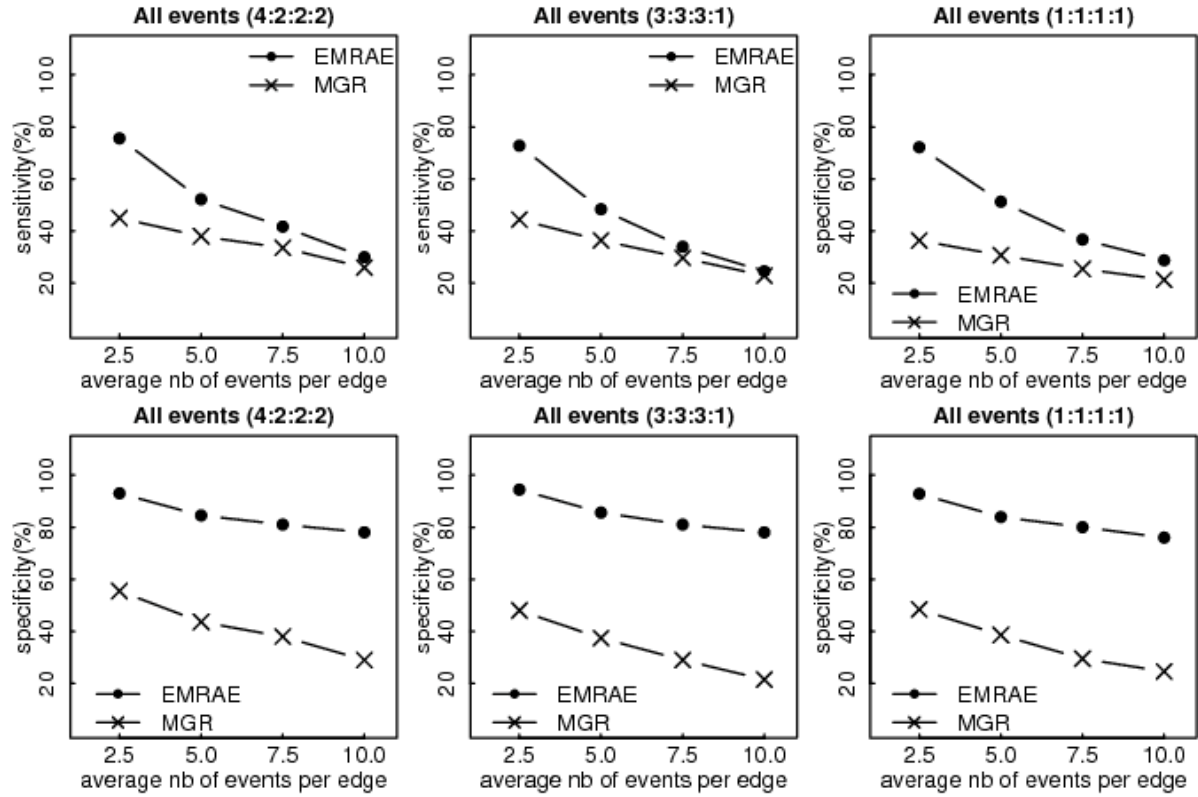

Supplementary Figure 1. Comparison of EMRAE and MGR's predictions for the All events model. The results are shown for 3 ratios of reversals, translocations, transpositions, fusion/fissions: 4:2:2:2, 3:3:3:1 and 1:1:1:1.

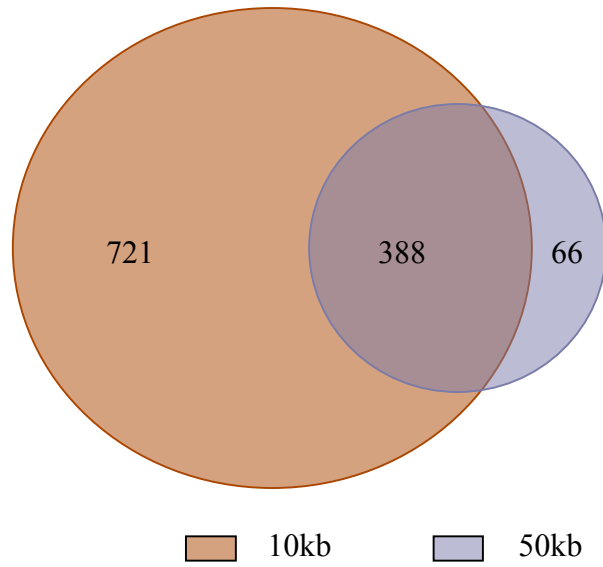

Supplementary Figure 2. Comparison of EMRAE's predictions between the 10Kb and 50Kb datasets.

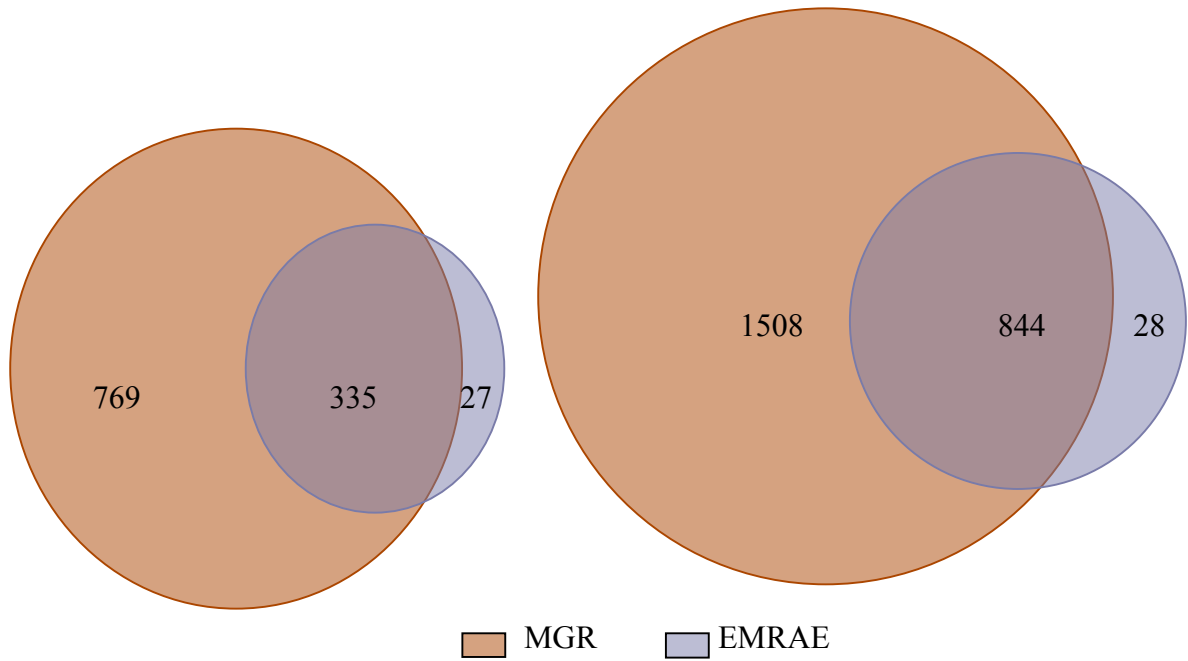

**(A)** Comparison on the 50-kb dataset

**(B)** Comparison on the 10-kb dataset

Supplementary Figure 3. Comparison between EMRAE and MGR excluding transpositions.

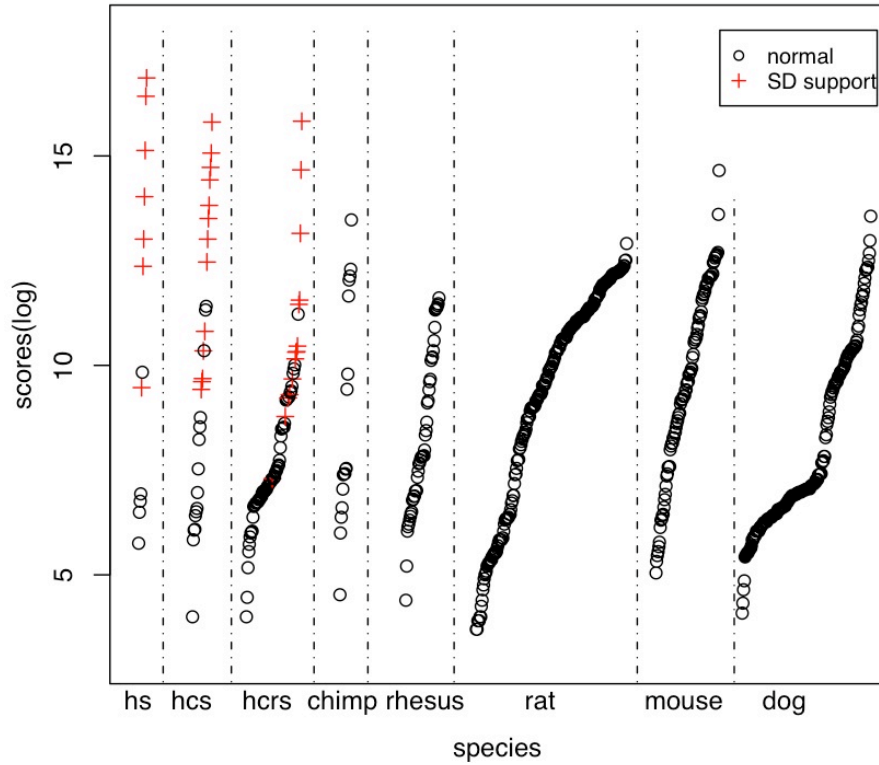

Supplementary Figure 4. Best Blast scores between the pairs of breakpoint regions associated with rearrangement events in the different lineages. The scores are plotted in a log-scale. Those primate reversals supported with pairs of SDs are labeled with “+”.

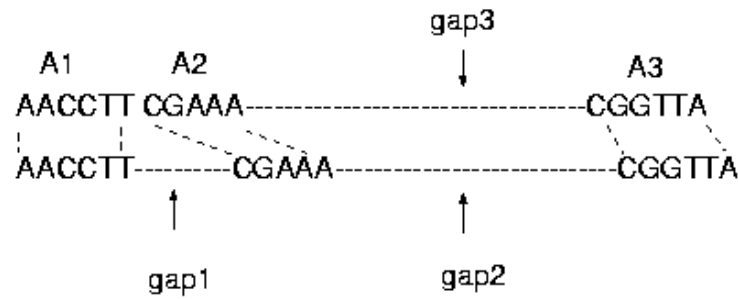

Supplementary Figure 5. An example of splitting chained alignments. In this example, the chain consists of three un-gapped alignments A1, A2 and A3. And gap1 is smaller than 300bps, while gap2 or gap3 is larger than 300 bps. Then we will break the chain into two independent alignments: A1 and A2 are merged into a single alignment since gap1 is

ignored; gap2 and gap3 are removed and thus A3 is separated into an independent alignment.

## Supplementary Tables

| Lineage | Bp1                       | Genes with bp1                                                                                                                                                                                                                                   | Bp2                       | Genes with bp2                    |
|---------|---------------------------|--------------------------------------------------------------------------------------------------------------------------------------------------------------------------------------------------------------------------------------------------|---------------------------|-----------------------------------|
| human   | chr5:68925902-69361045    | uc003jxm.2,uc003jxp.2*,uc010ixq.1,uc010ixr.1,uc003jxr.1,uc003jzg.2,uc003jxx.2,uc003jxz.2*,uc003jya.1*,uc003jyb.1*,                                                                                                                               | chr5:69457387-70782081    |                                   |
| human   | chr11:131981281-132001503 | uc009zcy.1,uc001qgs.1,uc001qgt.1,uc001qgu.1,                                                                                                                                                                                                     | chr11:132003494-132023494 |                                   |
| human   | chr13:113373993-113636378 | uc001vuh.1,                                                                                                                                                                                                                                      | chr13:113651104-113758051 |                                   |
| human   | chrX:101038511-101425486  | uc004eit.1,uc004eiv.2,uc004eiu.2,uc004eiw.2,uc004eix.2,                                                                                                                                                                                          | chrX:101453396-101544843  |                                   |
| HC      | chr2:159279068-159297701  | uc002uab.1,                                                                                                                                                                                                                                      | chr2:159297701-159314628  |                                   |
| HC      | chr3:196815575-196964433  | uc010hzq.1*,uc003fuz.1*,uc003fva.1*,uc003fvb.1*,uc003fvd.1*,uc003fve.1*,uc003fvc.1*,uc010hxr.1*,uc003fvm.1*,uc003fvg.1*,uc003fvf.1*,uc003fvh.1*,uc010hzs.1*,uc003fvi.1*,uc003fvj.1*,uc003fvk.1*,uc003fvl.1*,uc010hzt.1*,uc003fvo.1*,uc003fvp.1*, | chr3:198829062-198875855  |                                   |
| HC      | chr7:2527412-2547651      | uc003smh.2*,uc003smi.1*,                                                                                                                                                                                                                         | chr7:2668424-2688424      |                                   |
| HC      | chr11:82722470-82742470   | uc001pag.2,                                                                                                                                                                                                                                      | chr11:82795847-82820058   |                                   |
| HC      | chr13:41513616-44871138   | uc001vaf.2*,uc001vag.1*,uc001vah.1*,                                                                                                                                                                                                             | chr13:44895778-45937095   |                                   |
| HC      | chr16:2711236-2731236     | uc002crh.1*,uc002cri.1*,                                                                                                                                                                                                                         | chr16:2842485-2872103     |                                   |
| HC      | chr16:20410027-20544498   | uc002dhm.1*,uc002dhn.1*,uc010bwg.1*,                                                                                                                                                                                                             | chr16:20626906-20644419   |                                   |
| HC      | chr22:17309884-17383632   | uc002zon.1*,                                                                                                                                                                                                                                     | chr22:18663258-19074044   |                                   |
| HCR     | chr2:85383400-85403400    | uc002soz.1,uc002spa.1,uc002spb.1,uc010fgd.1,                                                                                                                                                                                                     | chr2:85407357-85428346    |                                   |
| HCR     | chr3:69614222-69632978    | uc003dnw.2,                                                                                                                                                                                                                                      | chr3:69632978-69657841    |                                   |
| HCR     | chr4:75009154-75111904    |                                                                                                                                                                                                                                                  | chr4:75215771-75235771    | uc003hhn.1,uc003hho.1,uc003hhp.1, |
| HCR     | chr10:29746730-29772951   | uc001iuo.1*,uc001iup.2*,uc001iuq.1*,                                                                                                                                                                                                             | chr10:30901853-31037464   |                                   |
| HCR     | chr19:61520299-61593702   | uc002qmy.1*,uc002q mz.1*,                                                                                                                                                                                                                        | chr19:61689010-61703865   |                                   |
| HCR     | chr5:99827040-99849238    | uc003kni.1,                                                                                                                                                                                                                                      | chr5:99877242-99897242    |                                   |
| HCR     | chr18:1130677-1150677     |                                                                                                                                                                                                                                                  | chr18:1340832-1364961     | uc002kld.1,                       |
| HCR     | chr3:116193598-116214464  | uc003ebm.1,uc003ebn.1,uc003ebp.2,                                                                                                                                                                                                                | chr3:116214463-116235103  |                                   |



|       |                           |                                                  |                           |  |
|-------|---------------------------|--------------------------------------------------|---------------------------|--|
| HCR   | chr22:19686704-19703212   | uc002ztz.2*,uc010gsu.1*,uc002zua.2*,uc002zuc.1*, | chr22:19714784-19744782   |  |
| HCR   | chr12:108961992-108981992 | uc001tqd.1*,uc001tqe.1*,uc001tqf.1*,             | chr12:119986740-120006740 |  |
| HCR   | chr19:62502809-62790802   | uc002qpg.1*,uc002qph.1*,uc002qpi.1*,uc002qpj.1*, | chr19:62804675-63134919   |  |
| Mouse | chr5:10164215-10191058    | uc008wlm.1*                                      | chr5:10231411-10270272    |  |

Supplementary Table 1. A number of mammalian reversals overlap genes that could correspond to lineage-specific innovations. For each such reversal, the coordinates of the two breakpoint regions are shown along with the full list of UCSC genes overlapping each breakpoint. Genes labeled with \* overlap both the breakpoint regions.

| chromosome | Bp1               | Bp2               | Published bp1     | Published bp2     | Lineage |
|------------|-------------------|-------------------|-------------------|-------------------|---------|
| Chr4       | 44506398-44506432 | 86178659-86180659 | 44563003-44603003 | 86255684-86296684 | Chimp   |
| Chr5       | 18586013-18589073 | 95946183-95948183 | 18582661-18622611 | 95031126-96011126 | Chimp   |
| Chr12      | 20854517-21291427 | 66657770-66677770 | 20845308-20885308 | 66631594-66671594 | Chimp   |
| Chr17      | 7865108-7876865   | 44965502-44985502 | 8123673-8163673   | 48068346-48108346 | Chimp   |

Supplementary Table 2. Coordinates of 4 chimp-specific centromeric inversions mapped on the human genome (hg18). Published breakpoint regions are mapped from hg17 to hg18 using the liftOver program from the UCSC genome browser.

|                         | Human | HC | HCR | Chimp | Rhesus | Mouse | Rat | Dog |
|-------------------------|-------|----|-----|-------|--------|-------|-----|-----|
| Revs < 100Kb            | 5     | 15 | 63  | 13    | 38     | 81    | 170 | 165 |
| Revs > 100Kb with SD    | 6     | 11 | 10  | NA    | NA     | NA    | NA  | NA  |
| Revs > 100Kb without SD | 1     | 2  | 5   | 4     | 11     | 8     | 50  | 15  |
| Total                   | 12    | 28 | 78  | 17    | 49     | 89    | 220 | 180 |

Supplementary Table 3. Reversals for which both breakpoints are defined within 100Kb.

“Revs < 100Kb” represents the reversals with well-defined breakpoints that will be analyzed for repeat content. “Revs >100 Kb” will be excluded from the repeat analysis because 1) their breakpoints are not precisely determined but also 2) because of the computational limitation in performing simulations. We note that in the primate lineage, SDs supports most of the excluded reversals.

|                          | Human | HC | HCR | Chimp | Rhesus | Rat | Mouse | dog |
|--------------------------|-------|----|-----|-------|--------|-----|-------|-----|
| Predicted reversals      | 12    | 29 | 83  | 17    | 49     | 227 | 90    | 184 |
| Actual reversals         | 12    | 28 | 78  | 17    | 49     | 220 | 89    | 180 |
| Predicted transpositions | 4     | 15 | 8   | 7     | 40     | 127 | 10    | 17  |
| Actual transpositions    | 4     | 14 | 8   | 7     | 40     | 125 | 10    | 17  |

Supplementary Table 4. List of events that can be localized (i.e. actual). It is easy to see that almost all of the predictions on the leaf edges and in the primate lineages can be localized.

|              | Number of events |        |      |         | Normalized number of events |        |      |         |
|--------------|------------------|--------|------|---------|-----------------------------|--------|------|---------|
|              | Rev              | Transp | Tloc | Fus/Fis | Rev                         | Transp | Tloc | Fus/Fis |
| human-chimp  | 66               | 11     | 3    | 1       | 10                          | 1.67   | 0.45 | 0.15    |
| human-rhesus | 197              | 61     | 19   | 2       | 10                          | 3.10   | 0.96 | 0.10    |
| human-mouse  | 541              | 92     | 138  | 6       | 10                          | 1.70   | 2.55 | 0.11    |
| human-rat    | 895              | 169    | 155  | 9       | 10                          | 1.89   | 1.73 | 0.10    |
| human-dog    | 490              | 53     | 76   | 17      | 10                          | 1.08   | 1.55 | 0.35    |
| mouse-rat    | 629              | 134    | 49   | 9       | 10                          | 2.13   | 0.78 | 0.14    |

Supplementary Table 5. The number of rearrangement events and normalized ratios for six pair of genomes at a 10Kb resolution.

## Supplementary References

- Newman, T.L., E. Tuzun, V.A. Morrison, K.E. Hayden, M. Ventura, S.D. McGrath, M. Rocchi, and E.E. Eichler. 2005. A genome-wide survey of structural variation between human and chimpanzee. *Genome Res* **15**: 1344-1356.
- Zhao, H. and G. Bourque. 2007. Recovering True Rearrangement Events on Phylogenetic Trees. In *Comparative Genomics, RECOMB 2007 International Workshop, RECOMB-CG 2007* eds G. Tesler and D. Durand), pp. 149-161. Springer, San Diego, CA, USA.
